# Supplementary material
Source: Elsevier journal article supplement (https://www.sciencedirect.com/science/article/pii/S234119292030127X)
Supplement: mmc1 [file S234119292030127X:mmc1.pdf]

## ***Pantalla de protección facial con visera 3D***

### **JUSTIFICACIÓN**

Ante la situación de alarma sanitaria generada por la pandemia por coronavirus, una de las medidas más importantes es la protección integral de cada profesional sanitario, puesto que son las personas que tienen un mayor riesgo de contagio. Las medidas de prevención contra la expansión se convierten en armas fundamentales para reducir las transmisiones y en esta línea los EPI'S (Equipos de Protección Individual) son esenciales para el personal que combate la enfermedad. La capacidad de abastecimiento de estos EPI'S, debido a la gran demanda en un corto plazo de tiempo, se convierte en un problema para el país. El personal sanitario se enfrenta a la falta de stock de pantallas de protección facial y surge la necesidad de adaptar los procesos de fabricación de este tipo de EPI. Entonces, aparecen iniciativas para paliar esta escasez de equipos de protección mediante la fabricación aditiva (impresión 3D). El Hospital virtual Valdecilla, apoyado por otros colectivos colaboradores, centraliza la producción de viseras 3D y el ensamblado posterior de las pantallas de protección faciales que se utilizan en el Hospital Universitario Marqués de Valdecilla.

### **DISEÑO**

Estas pantallas deben aportar el máximo recubrimiento facial, una alta tasa de transparencia y un bajo peso. También es importante la ergonomía de la pantalla para que permita trabajar al profesional con ella el mayor número de horas continuadas sin molestia y con contar con una ventilación continua. Además, es conveniente que puedan reutilizarse.

### **PROCESO DE FABRICACIÓN**

Se ha diseñado, prototipado, fabricado y testeado un tipo de máscara de protección facial tomando como referencia un diseño original de un Hospital alemán al que posteriormente se han realizado modificaciones. Se realiza una fabricación aditiva (impresión 3D) de la visera con filamento PLA y después se ensambla con dos pantallas de acetato y una cinta elástica. Utilizar dos pantallas proporciona mayor seguridad al profesional sanitario porque cubre también la parte superior del rostro.

### **COMPONENTES DE LA PANTALLA DE PROTECCIÓN FACIAL CON VISERA 3D**

1. Visera de PLA impresa en 3D. Peso de 18 grs.
2. 2 pantallas de acetato de 0,3 mm.
3. Cinta elástica de apriete de 230 mm de longitud.

### **ENSAMBLAJE**

En la página donde has descargado este documento puedes ver también un vídeo con el proceso de ensamblado.

Con el propósito de optimizar el proceso de ensamblaje se proponen a continuación los pasos de manera cronológica que hemos establecido en el Hospital virtual Valdecilla.

1. Lijado y pulido de las superficies en contacto con la cabeza del sanitario y retirada de soportes en el caso de que los haya.
2. Agujerear una pantalla de acetato tamaño A4 con las medidas que se indican en el video. Y recortar y agujerear otra pantalla de la misma manera.
3. Ensamblar las pantallas de acetato según se explica en el vídeo demostrativo.
4. Corte de cinta elástica de una longitud de 230 mm.
5. Corte de ojales en uno de los extremos de la cinta. Proponemos 4 cortes con un tamaño suficiente para que pase el extremo de la visera que está abierto. Así se puede adaptar a distintos tamaños de cabeza.
6. En el extremo de la visera con una forma circular cerrada, introducir un extremo de la cinta y grapar.
